# Supplementary material for: Protein–nanoparticle labelling probed by surface enhanced resonance Raman spectroscopy
Source: Royal Society of Chemistry journal article supplement (doi:10.1039/b707660f), 2007-01-01
Supplement: b707660f.pdf [file b707660f.pdf]

## Supplementary Information.

### Experimental Details.

**Benzotriazole dye conjugation to YcC.** YcC was coupled to PAM with a 25 fold excess of dye. This was conducted in an Eppendorf safe-twist tube containing 80  $\mu\text{l}$  YcC ( $1.0 \times 10^{-4}$  mol  $\text{dm}^{-3}$  in phosphate buffer 10 mM, pH7), 400  $\mu\text{l}$  phosphate buffer, and 20  $\mu\text{l}$  PAM  $1.0 \times 10^{-4}$  mol  $\text{dm}^{-3}$  in DMF). The reaction was left at room temperature and gently mixed for 2 hours.

**Size exclusion HPLC.** Separation of the modified YcC from excess dye was achieved by size exclusion HPLC, using a 5 ml Sephadex column (Amersham Biosciences) on a Dionex instrument. Phosphate buffer, pH 7 was used as the mobile phase (1 ml / min), with UV/Vis detection at 283, 384, 406 and 599 nm. The product of the YcC with PAM reaction was collected, and labelled [1].

**SE(R)RS Analysis.** SE(R)RS spectra were recorded using a Renishaw confocal system with a CCD detector. A Kr ion laser provided excitation of 406 nm. All spectra were collected from a microtitre plate using a  $20 \times$  objective. A Renishaw probe system was also used with 514 nm excitation,  $20 \times$  objective, and disposable cuvettes used. The general assay for all SERRS analysis was: 400  $\mu\text{l}$  citrate reduced silver colloid, 400  $\mu\text{l}$  H<sub>2</sub>O, 200  $\mu\text{l}$  analyte, 30  $\mu\text{l}$  0.01 % poly-L-lysine. The reagents were added to a disposable cuvette in the order given, and vortexed briefly. 320  $\mu\text{l}$  of sample was removed from the cuvette and added to a well of the microtitre plate for analysis.
